# Supplementary material for: Potassium energy storage behavior of nickel–zinc co-doped Prussian blue analogs formed by a chelating-agent-assisted route and its application in a K+-proton hybrid-ion aqueous alkaline battery
Source: Royal Society of Chemistry journal article supplement (doi:10.1039/d3nj04095j), 2023-11-17
Supplement: d3nj04095j1.pdf [file d3nj04095j1.pdf]

## Supporting information

### **The potassium energy storage behavior of Nickel-Zinc co-doped Prussian blue analogs formed by a chelating agent assisted route and its application in a K<sup>+</sup>-proton hybrid ions aqueous alkaline Battery**

Ruiqing Hua<sup>a</sup>, Caiyun Xu<sup>a</sup>, Dian Lin<sup>a</sup>, Deyu Qu<sup>a\*</sup>, Xi Li<sup>a</sup>, Ruiming Zhang<sup>c</sup>, Zhizhong Xie<sup>a\*</sup>, Haolin Tang<sup>b,d</sup>, Junsheng Li<sup>a,d</sup>, Dan Liu<sup>a,c\*</sup>

<sup>a</sup> *Department of Chemistry, School of Chemistry, Chemical Engineering and Life Science, Wuhan University of Technology, 122 Luoshi Road, Wuhan 430070, Hubei, P.R. China*

<sup>b</sup> *State Key Laboratory of Advanced Technology for Material Synthesis and Processing, School of Materials Science and Engineering, Wuhan University of Technology, 122 Luoshi Road, Wuhan 430070, Hubei, P.R. China*

<sup>c</sup> *Foshan Xianhu Laboratory of the Advanced Energy Science and Technology Guangdong Laboratory, Xianhu Hydrogen Valley, Foshan 528200, China*

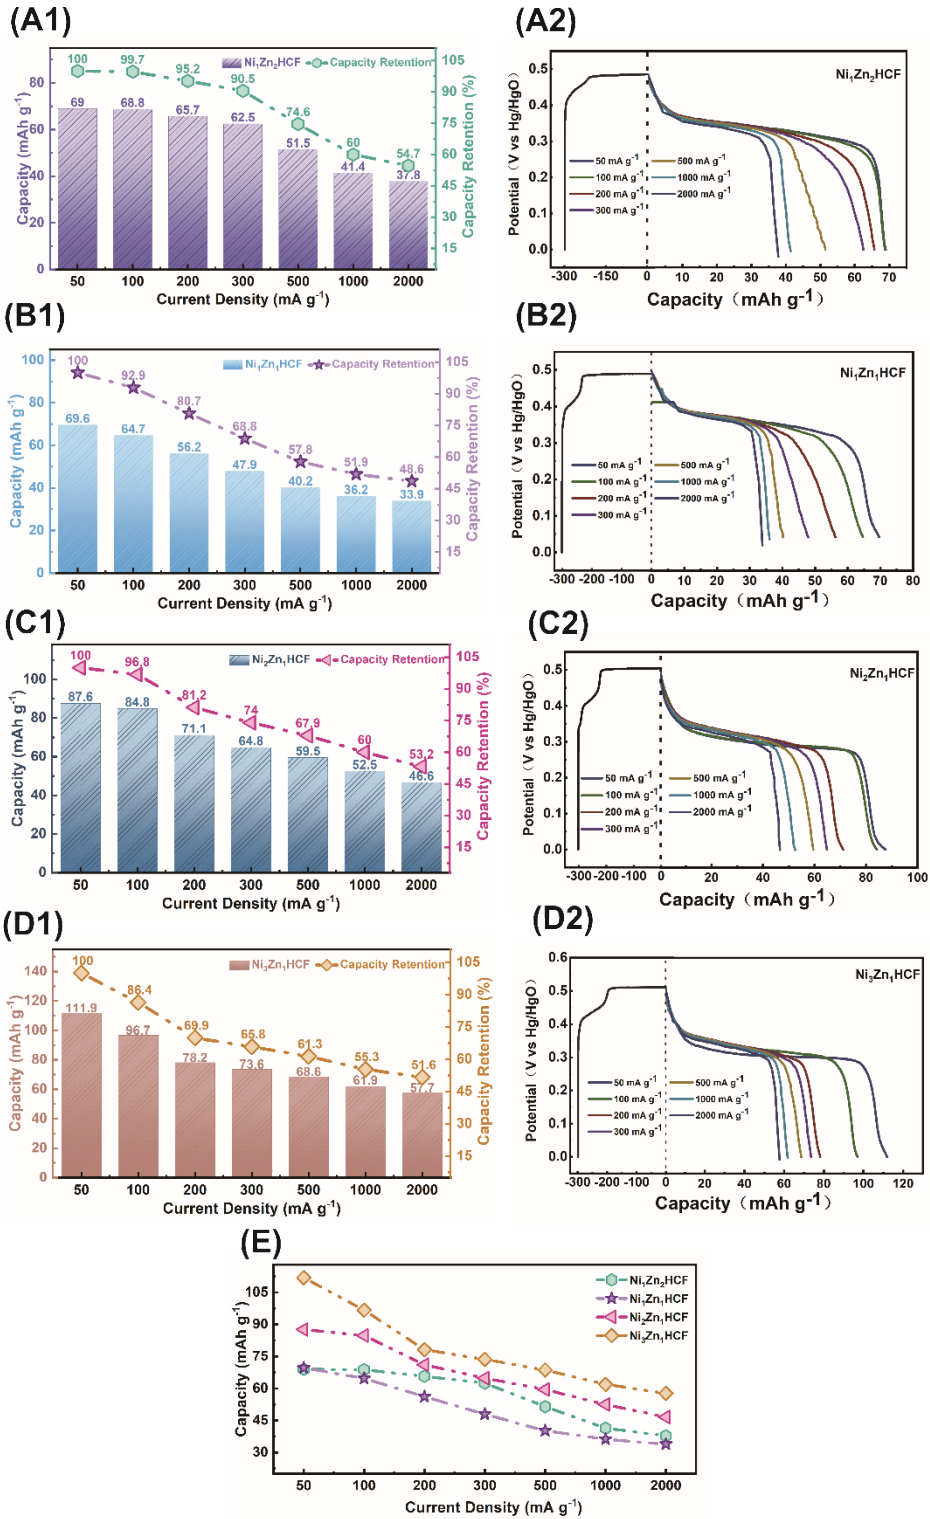

Fig.S1. Rate performances of Ni<sub>x</sub>Zn<sub>y</sub>HCF electrodes. (A1)(A2): Ni<sub>1</sub>Zn<sub>2</sub>HCF. (B1)(B2): Ni<sub>1</sub>Zn<sub>1</sub>HCF. (C1)(C2): Ni<sub>2</sub>Zn<sub>1</sub>HCF. (D1)(D2): Ni<sub>3</sub>Zn<sub>1</sub>HCF. (E) the comparison of Ni<sub>x</sub>Zn<sub>y</sub>HCF electrodes.

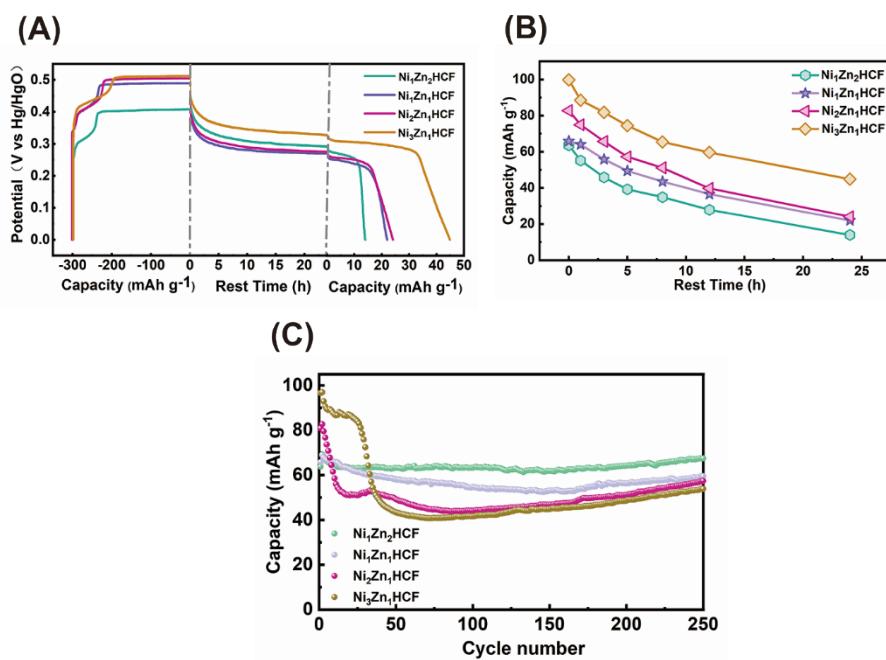

Fig.S2. (A) Open-circuit potential profiles and charge-discharge curves under an applied current density of  $100 \text{ mA g}^{-1}$  after charging the electrode for 3 h in 30 wt% KOH solution followed by 24 h at open circuit potential. (B) Discharge capacities after resting at various of time. (C) Cyclic performances of the  $\text{Ni}_x\text{Zn}_y\text{HCF}$  electrodes.

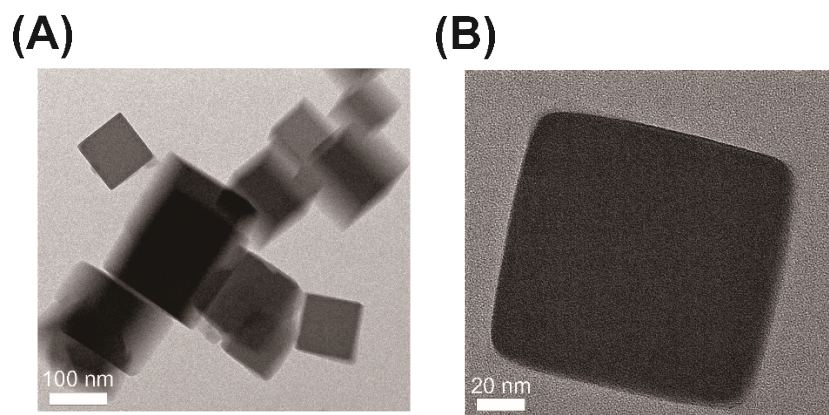

Fig.S3. TEM images of  $\text{Ni}_3\text{Zn}_1\text{HCF-10}$ .

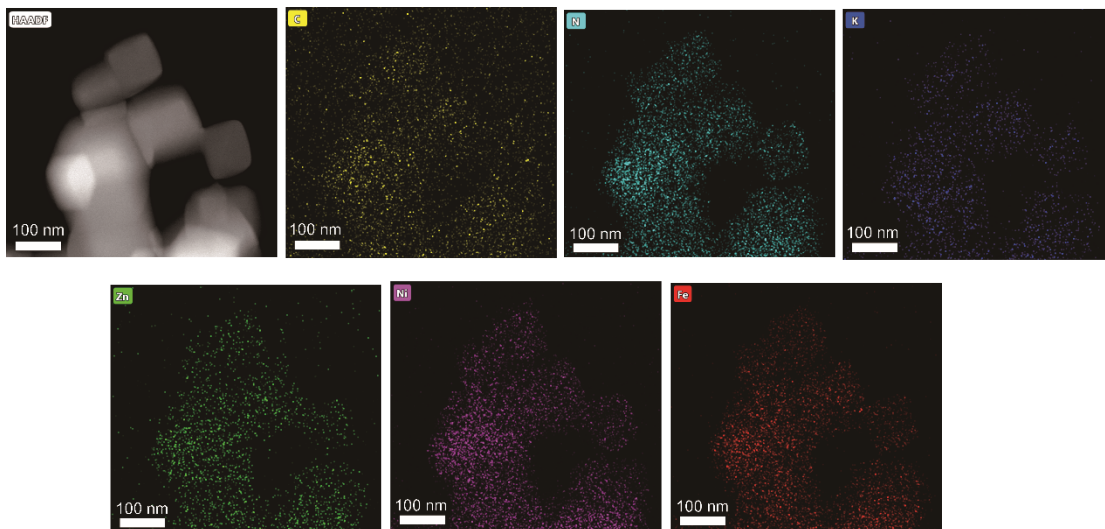

Fig.S4. Energy-dispersive spectroscopic (EDS) elemental mapping images of Ni<sub>3</sub>Zn<sub>1</sub>HCF-10.

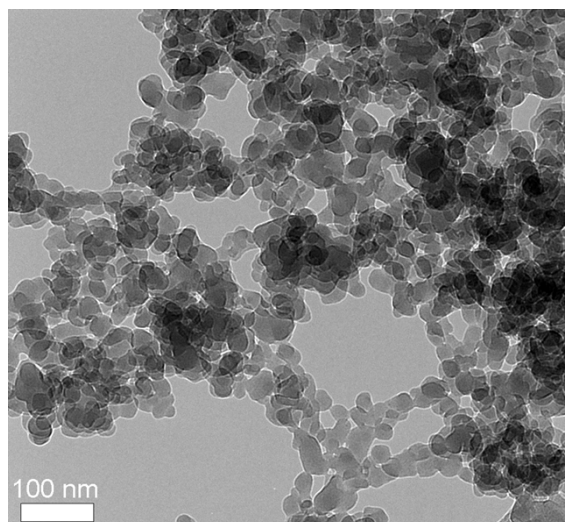

Fig.S5. TEM image of  $\text{Ni}_3\text{Zn}_1\text{HCF}$ .

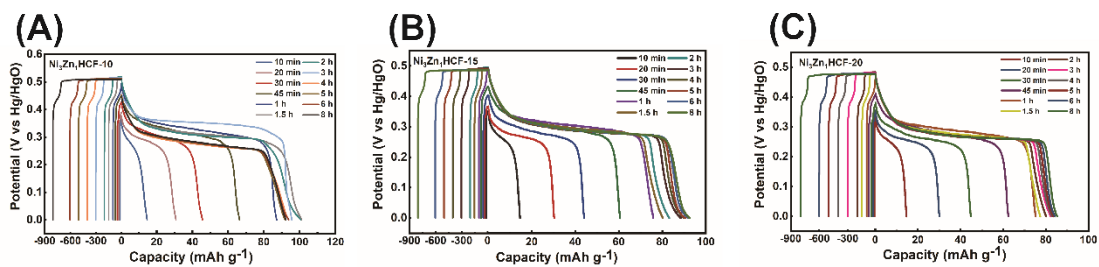

Fig.S6. Charge and discharge curves of  $\text{Ni}_3\text{Zn}_1\text{HCF-Z}$  ( $Z=10,15,20$ ) electrodes after being charge for various time.

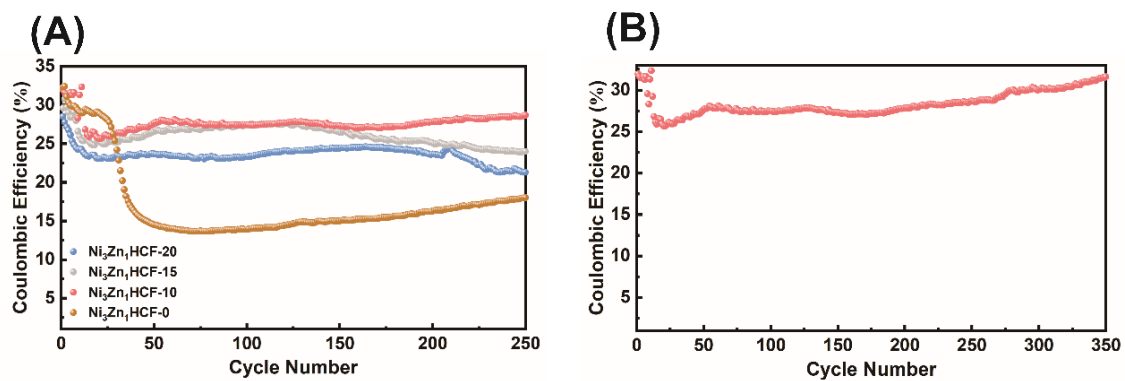

Fig.S7. (A) Coulombic efficiencies of  $\text{Ni}_3\text{Zn}_1\text{HCF-Z}$  electrode ( $Z=0,10,15,20$ ) under  $100 \text{ mA g}^{-1}$  (250 cycles). (B) Coulombic efficiencies of  $\text{Ni}_3\text{Zn}_1\text{HCF-10}$  electrode under  $100 \text{ mA g}^{-1}$  (350 cycles).



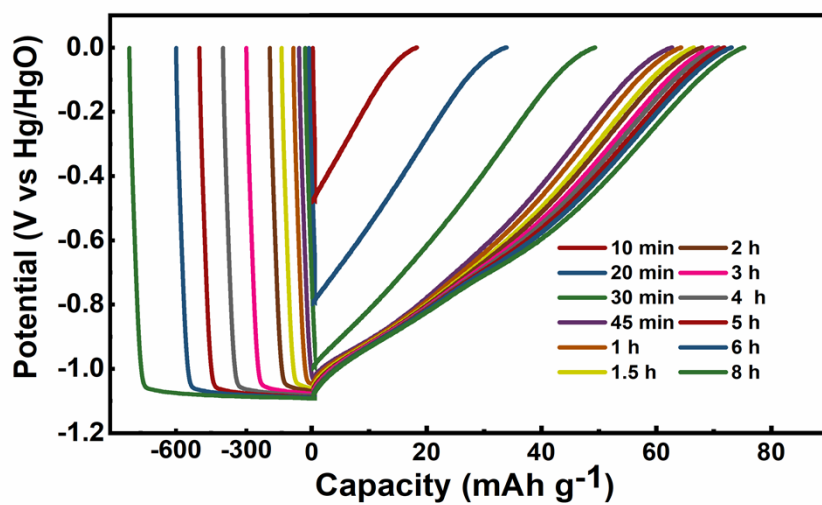

Fig.S8. Charge and discharge curves of AC electrode after being charge for various time.

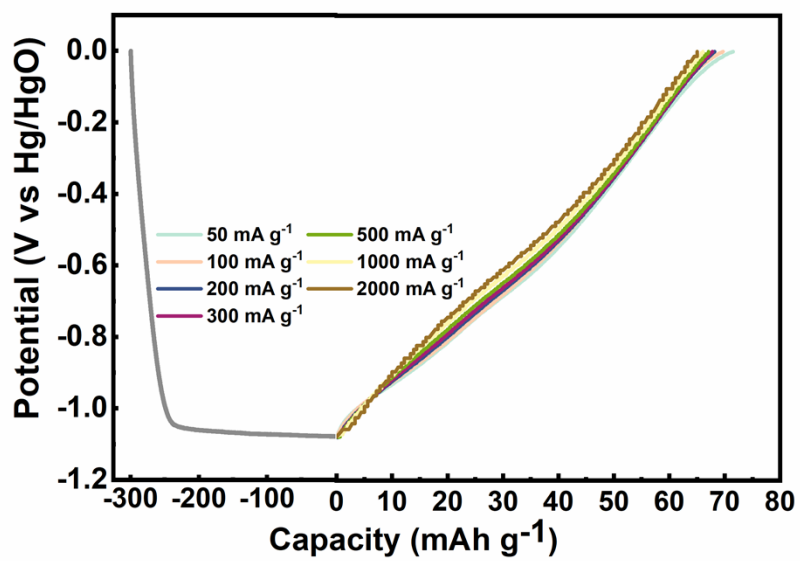

Fig.S9. Rate performance of AC.

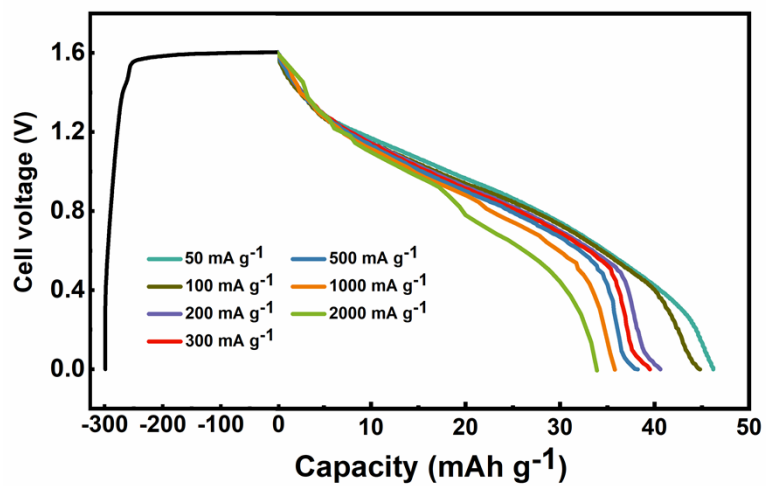

Fig.S10. Rate performance of the full cell.

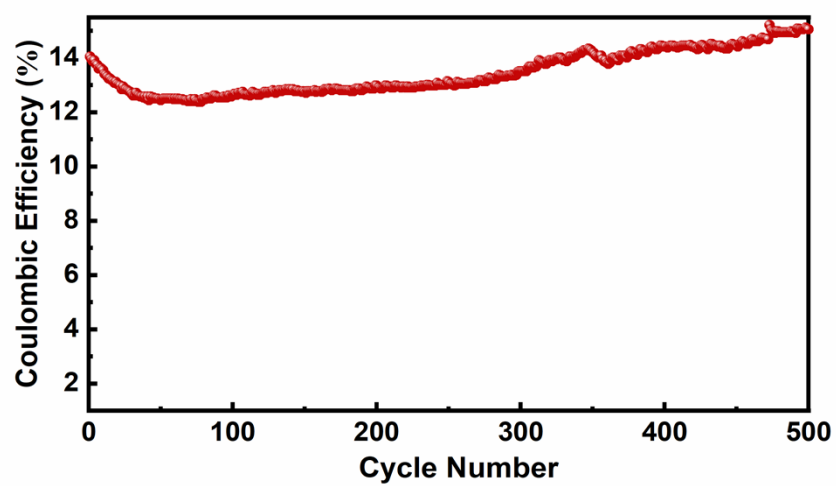

Fig.S11. Coulombic efficiencies of full cell under  $100 \text{ mA g}^{-1}$  (500 cycles).

Table S1: The electrode performance comparison of our work and other aqueous batteries reported previously.

| Cathode material | Electrolyte                                     | Rate capability                                     | Initial capacity         | Cyclability        | Ref.    |
|------------------|-------------------------------------------------|-----------------------------------------------------|--------------------------|--------------------|---------|
| CuHCF            | Al <sub>2</sub> (SO <sub>4</sub> ) <sub>3</sub> | 74% capacity retention (30.3 mAh g <sup>-1</sup> )  | 41 mAh g <sup>-1</sup>   | 1000 cycles, 54.9% | Ref [1] |
| PB               | NaSO <sub>4</sub>                               | 68% capacity retention (34.5 mAh g <sup>-1</sup> )  | 50 mAh g <sup>-1</sup>   | 200 cycles, 84%    | Ref [2] |
| NiHCF            | ZnSO <sub>4</sub>                               | 52% capacity retention(35 mAh g <sup>-1</sup> )     | 67 mAh g <sup>-1</sup>   | 100 cycles, 87%    | Ref [3] |
| MgFeHCF          | FeSO <sub>4</sub>                               | 75% capacity retention (65 mAh g <sup>-1</sup> )    | 86 mAh g <sup>-1</sup>   | 500 cycles, 70.9 % | Ref [4] |
| This work        | KOH                                             | 52.9% capacity retention(50.5 mAh g <sup>-1</sup> ) | 95.5 mAh g <sup>-1</sup> | 350 cycles, 99.9%  |         |

**Reference:**

- [1] S. Liu, G.L. Pan, G.R. Li, X.P. Gao, *J. Mater. Chem. A*, 2015, **3**, 959-962.
- [2] A.J. Fernández-Ropero, M.J. Piernas-Muñoz, E. Castillo-Martínez, T. Rojo, M. Casas-Cabanas, *Electrochim. Acta*, 2016, **210**, 352-357.
- [3] Z. Li, T. Liu, R. Meng, L. Gao, Y. Zou, P. Peng, Y. Shao, X. Liang, *Energy Environ. Mater.*, 2020, **4**, 111-116.
- [4] G. Huang, Z. Lao, Z. He, F. Xiong, S. Tan, M. Huang, G. Thompson, Q. An, L. Mai, *Chem. Commun.*, 2023, **59**, 4067-4070.

Table S2: ICP-OES, inductively coupled plasma optical emission spectrometry.

| Material                            | Elements contents (%) |       |       |       |                  | Chemical formula                                                                                                                        |
|-------------------------------------|-----------------------|-------|-------|-------|------------------|-----------------------------------------------------------------------------------------------------------------------------------------|
|                                     | K                     | Ni    | Zn    | Fe    | H <sub>2</sub> O |                                                                                                                                         |
| Ni <sub>1</sub> Zn <sub>2</sub> HCF | 0.44                  | 5.68  | 12.13 | 12.45 | 20.64            | K <sub>0.04</sub> Ni <sub>0.33</sub> Zn <sub>0.66</sub> [Fe(CN) <sub>6</sub> ] <sub>0.80</sub> •□ <sub>0.20</sub> •4.12H <sub>2</sub> O |
| Ni <sub>1</sub> Zn <sub>1</sub> HCF | 1.21                  | 10.8  | 9.66  | 12.97 | 17.83            | K <sub>0.11</sub> Ni <sub>0.5</sub> Zn <sub>0.5</sub> [Fe(CN) <sub>6</sub> ] <sub>0.79</sub> •□ <sub>0.21</sub> •4.47H <sub>2</sub> O   |
| Ni <sub>2</sub> Zn <sub>1</sub> HCF | 1.14                  | 6.63  | 13.79 | 13.01 | 19.73            | K <sub>0.1</sub> Ni <sub>0.66</sub> Zn <sub>0.33</sub> [Fe(CN) <sub>6</sub> ] <sub>0.76</sub> •□ <sub>0.24</sub> •3.70H <sub>2</sub> O  |
| Ni <sub>3</sub> Zn <sub>1</sub> HCF | 1.24                  | 15.15 | 4.96  | 13.27 | 24.21            | K <sub>0.1</sub> Ni <sub>0.75</sub> Zn <sub>0.25</sub> [Fe(CN) <sub>6</sub> ] <sub>0.78</sub> •□ <sub>0.22</sub> •4.43H <sub>2</sub> O  |

The composition and formula of Ni<sub>1</sub>Zn<sub>2</sub>HCF, Ni<sub>1</sub>Zn<sub>1</sub>HCF and Ni<sub>2</sub>Zn<sub>1</sub>HCF samples are also evaluated along with the Ni<sub>3</sub>Zn<sub>1</sub>HCF which summarized in the table S2. It is found that the amount of [Fe(CN)<sub>6</sub>] vacancies are relatively similar among them. Meantime, the Ni<sub>3</sub>Zn<sub>1</sub>HCF sample has the highest content of crystal H<sub>2</sub>O among the four samples. Since the existing of crystal water may jeopardize the capacity of PBA and Ni<sub>3</sub>Zn<sub>1</sub>HCF sample has the highest capacity among the four samples, the observed electrochemical behaviors difference between Ni<sub>1</sub>Zn<sub>2</sub>HCF, Ni<sub>1</sub>Zn<sub>1</sub>HCF, Ni<sub>2</sub>Zn<sub>1</sub>HCF and Ni<sub>3</sub>Zn<sub>1</sub>HCF samples may be mainly due to different Ni to Zn ratios in the samples. The effects of vacancies and crystal water upon the electrochemical performances may become significant when the samples have the same ratio of Ni to Zn, as demonstrated between the Ni<sub>3</sub>Zn<sub>1</sub>HCF-10 and Ni<sub>3</sub>Zn<sub>1</sub>HCF-0 materials.
